# Supplementary material
Source: HighWire-hosted journal article supplement (http://jpet.aspetjournals.org/highwire/filestream/135654/field_highwire_adjunct_files/1/JPET183764_Sup_Tables.pdf)
Supplement: JPET183764_Sup_Tables.pdf [file JPET183764_Sup_Tables.pdf]

Longo et al, Pharmacologic inhibition of ghrelin receptor signaling is insulin sparing and promotes insulin sensitivity. JPET

**Supplemental Table 1:** Intrinsic and functional properties of five ghrelin receptor antagonists. See text for details on analysis of  $K_i$  values. %F was calculated using area under the curve (AUC) values for plasma concentrations of compounds following their iv and oral administration. Analyses were performed by plasma extraction and compound-specific liquid chromatography/mass spectrometry assays.

| Compound | MW (Da) | Functional $K_i$ ( $\mu$ M) | Binding $K_i$ ( $\mu$ M) | %F |
|----------|---------|-----------------------------|--------------------------|----|
| A        | 474     | 0.013                       | 0.038                    | 16 |
| B        | 486     | 0.015                       | 0.015                    | 63 |
| C        | 500     | 0.020                       | 0.025                    | 34 |
| D        | 550     | 0.016                       | 0.052                    | 11 |
| E        | 568     | 0.051                       | 0.076                    | 5  |

Longo et al, Pharmacologic inhibition of ghrelin receptor signaling is insulin sparing and promotes insulin sensitivity. JPET

**Supplemental Table 2:** Blood biochemistry parameters evaluated in HFD-fed C57BL/6 mice dosed for 56 days (60mg/Kg, bid, po). The results are suggestive of no overt systemic toxicities.

|                           | 56 Days |          |            |          |                   |
|---------------------------|---------|----------|------------|----------|-------------------|
|                           | Vehicle |          | Compound B |          | <i>p</i> value    |
|                           | Mean    | ±Std Dev | Mean       | ±Std Dev | T-Test            |
| Sodium (MEQ/L)            | 154.3   | 1.0      | 152.3      | 2.2      | ns                |
| Chloride (MEQ/L)          | 108.1   | 3.1      | 107.7      | 4.4      | ns                |
| Phosphorus (mg/dL)        | 8.5     | 1.4      | 7.8        | 0.8      | ns                |
| Bicarbonate (MEQ/L)       | 24.3    | 1.9      | 23.5       | 2.8      | ns                |
| CPK (U/L)                 | 292.1   | 267.4    | 203.3      | 80.8     | ns                |
| LDH (U/L)                 | 1495.4  | 434.7    | 396.5      | 76.5     | <i>p</i> < 0.0001 |
| AST (U/L)                 | 395.3   | 83.8     | 159.7      | 24.1     | <i>p</i> < 0.0001 |
| ALT (U/L)                 | 416.7   | 74.8     | 110.7      | 37.4     | <i>p</i> < 0.0001 |
| Amylase (U/L)             | 2203.9  | 183.3    | 1940.60    | 263.20   | ns                |
| Bilirubin, Total (mg/dL)  | 0.2     | 0.1      | 0.4        | 0.3      | ns                |
| Bilirubin, Direct (mg/dL) | 0.01    | 0.04     | 0.00       | 0.00     | ns                |
| BUN (mg/dL)               | 24.4    | 1.7      | 15.7       | 2.7      | <i>p</i> < 0.0001 |
| Creatinine (mg/dL)        | 0.4     | 0.0      | 0.4        | 0.1      | ns                |
| Uric Acid (mg/dL)         | 1.7     | 0.9      | 2.0        | 0.7      | ns                |
| Albumin (g/dL)            | 3.6     | 0.1      | 3.5        | 0.1      | <i>p</i> = 0.0289 |
| Protein, Total            | 6.5     | 0.2      | 6.4        | 0.3      | ns                |
| Globulin                  | 2.8     | 0.2      | 3.0        | 0.2      | ns                |
| SDH                       | 27.9    | 3.2      | 20.8       | 3.1      | <i>p</i> = 0.0021 |

Longo et al, Pharmacologic inhibition of ghrelin receptor signaling is insulin sparing and promotes insulin sensitivity. JPET

| Main effects              | Comparison | n  | Median survival (days) | Chi square | <i>p</i> value |
|---------------------------|------------|----|------------------------|------------|----------------|
| Gender                    | Male       | 65 | 747                    | 11.94      | 0.0005         |
|                           | Female     | 78 | 668                    |            |                |
| Diet                      | LFD        | 76 | 755                    | 23.64      | <0.0001        |
|                           | HFD        | 67 | 612                    |            |                |
| Genotype                  | WT         | 68 | 705                    | 0.43       | 0.511          |
|                           | KO         | 75 | 719                    |            |                |
| Within Diet*Gender groups |            |    |                        |            |                |
| LFD*male                  | WT         | 18 | 821                    | 0.39       | 0.531          |
|                           | KO         | 18 | 777                    |            |                |
| LFD*female                | WT         | 17 | 732                    | 0.27       | 0.602          |
|                           | KO         | 23 | 725                    |            |                |
| HFD*male                  | WT         | 12 | 652                    | 2.25       | 0.133          |
|                           | KO         | 17 | 700                    |            |                |
| HFD*female                | WT         | 21 | 560                    | 2.14       | 0.144          |
|                           | KO         | 17 | 649                    |            |                |

**Supplemental Table 3.** Statistical analysis of survival for the main effects, and genotype effects with Diet\*Gender groups. Fractions of surviving animals were calculated using the Kaplan-Meier method, and significance was evaluated using the chi-square test. Censored animals were not included in the analysis.
